# Supplementary material for: Nonadherence to tuberculosis treatment and associated factors among patients using directly observed treatment short-course in north-west Nigeria: A cross-sectional study
Source: PubMed Central journal article supplement — SAGE Open Med. 2021 Jan 30;9:2050312121989497. doi: 10.1177/2050312121989497 (PMC7871291; doi:10.1177/2050312121989497), 2021-01-30
Supplement: sj-pdf-1-smo-10.1177_2050312121989497.pdf [file sj-pdf-1-smo-10.1177_2050312121989497.pdf]

## Supplementary Material 1: Appendix 1

### Tuberculosis medication adherence questionnaire (TBMAQ)

| S/n | TBMAQ Items                                                                                                                        | Never | Sometimes | Most of the time | All the time |
|-----|------------------------------------------------------------------------------------------------------------------------------------|-------|-----------|------------------|--------------|
| 1.  | Do you take medication for your TB as prescribed by the doctor?                                                                    |       |           |                  |              |
| 2.  | Do you have problems remembering to take your medication?                                                                          |       |           |                  |              |
| 3.  | I take all my TB doses as instructed by the doctor/nurse                                                                           |       |           |                  |              |
| 4.  | I skip my medications due to some reasons such as during Ramadan, taste of drugs (toxic/harmful), too many pills, and side effects |       |           |                  |              |
| 5.  | I use the medication because it makes me feel better (i.e., medication alleviates the pains and discomfort)                        |       |           |                  |              |
| 6.  | Do you receive social support from family and friends to take your medications?                                                    |       |           |                  |              |
| 7.  | I miss clinic visit when scheduled                                                                                                 |       |           |                  |              |
| 8.  | Have you ever felt uncomfortable about adhering to your medication plan?                                                           |       |           |                  |              |
