# Supplementary material for: Nonadherence to tuberculosis treatment and associated factors among patients using directly observed treatment short-course in north-west Nigeria: A cross-sectional study
Source: PubMed Central journal article supplement — SAGE Open Med. 2021 Jan 30;9:2050312121989497. doi: 10.1177/2050312121989497 (PMC7871291; doi:10.1177/2050312121989497), 2021-01-30
Supplement: sj-pdf-2-smo-10.1177_2050312121989497.pdf [file sj-pdf-2-smo-10.1177_2050312121989497.pdf]

## Supplementary Material 2: Appendix 2

### DOTS SERVIQUAL questionnaire

|     | Domains of DOTS SERVIQUAL                                                                                        | SD | D | A | SA |
|-----|------------------------------------------------------------------------------------------------------------------|----|---|---|----|
|     | <b>Tangibility</b>                                                                                               |    |   |   |    |
| 1.  | I expect TB drugs to be available at the DOTS center                                                             |    |   |   |    |
| 2.  | I expect DOTS center to have clean environment, running water, regular electricity, and refrigeration facilities |    |   |   |    |
|     | <b>Reliability</b>                                                                                               |    |   |   |    |
| 3.  | I expect staff at the DOTS center to keep my appointments                                                        |    |   |   |    |
| 4.  | I expect staff to ensure that my treatment protocols are observed                                                |    |   |   |    |
|     | <b>Responsiveness</b>                                                                                            |    |   |   |    |
| 5.  | I expect staff at DOTS center to always get my records on time whenever required                                 |    |   |   |    |
| 6.  | I expect staff to provide information on my current health condition and recovery status                         |    |   |   |    |
|     | <b>Assurance</b>                                                                                                 |    |   |   |    |
| 7.  | I expect laboratory results at the DOTS center will be timely delivered                                          |    |   |   |    |
| 8.  | I expect the staff at DOTS center to assess the accuracy of my lab results (i.e., sputum smear-microscopy)       |    |   |   |    |
|     | <b>Empathy</b>                                                                                                   |    |   |   |    |
| 9.  | I to pay staff at the DOTS attention to my medical concerns                                                      |    |   |   |    |
| 10. | I expect staff at the DOTS center give attention to my specific needs                                            |    |   |   |    |

Note. *SD, strongly disagree; D, Disagree; A, Agree; SA, Strongly agree.*
