# Supplementary material for: Nonadherence to tuberculosis treatment and associated factors among patients using directly observed treatment short-course in north-west Nigeria: A cross-sectional study
Source: PubMed Central journal article supplement — SAGE Open Med. 2021 Jan 30;9:2050312121989497. doi: 10.1177/2050312121989497 (PMC7871291; doi:10.1177/2050312121989497), 2021-01-30
Supplement: sj-pdf-3-smo-10.1177_2050312121989497.pdf [file sj-pdf-3-smo-10.1177_2050312121989497.pdf]

### Supplementary material 3

#### Satisfaction with DOTS service questionnaire

| s/n | Items                                                                                                         | Excellent | Good | Fair | Poor |
|-----|---------------------------------------------------------------------------------------------------------------|-----------|------|------|------|
|     | <b>Health facility environment</b>                                                                            |           |      |      |      |
| 1.  | The seats in the waiting area are neat and comfortable                                                        |           |      |      |      |
| 2.  | The surroundings of the health facility are neat                                                              |           |      |      |      |
|     | <b>Process of care</b>                                                                                        |           |      |      |      |
| 3.  | The availability of the medical staff at DOTS center to answer your question                                  |           |      |      |      |
| 4.  | The advice you get from the medical staff at DOTS center about problems that might occur with your medication |           |      |      |      |
| 5.  | Availability of TB drugs are available at the DOTS center                                                     |           |      |      |      |
|     | <b>Healthcare experience</b>                                                                                  |           |      |      |      |
| 6.  | The amount of time the staff at DOTS center spends with you                                                   |           |      |      |      |
| 7.  | Satisfaction with attention to your medical concerns by staff at DOTS center                                  |           |      |      |      |
| 8.  | Nurses and doctors at DOTS center kept my appointment                                                         |           |      |      |      |
| 9.  | Speed of retrieval my records whenever required by staff at DOTS center                                       |           |      |      |      |
|     | <b>Diagnosis and treatment</b>                                                                                |           |      |      |      |
| 10. | Timely delivery of my laboratory results                                                                      |           |      |      |      |
| 11. | The nurse or doctor's instructions on your condition and treatment procedures are clear                       |           |      |      |      |
| 12. | The efforts of doctors and nurses to help you improve your health or stay healthy                             |           |      |      |      |
|     | <b>Patient-health worker relationship</b>                                                                     |           |      |      |      |
| 13. | The help you get from the medical staff to avoid unnecessary costs related to your prescriptions              |           |      |      |      |
| 14. | The availability of a nurse or health worker to answer your questions                                         |           |      |      |      |
| 15. | The privacy of your conversations with the nurse or doctor                                                    |           |      |      |      |
